# Supplementary material
Source: MDPI journal article supplement (https://www.mdpi.com/2073-4441/13/3/353)
Supplement: s1 [file s1]

## Supplementary Information

**Table S1.** HYDRUS iteration criteria and model tolerances used for all simulations

| Variable                                                                                                                                                   | Value |
|------------------------------------------------------------------------------------------------------------------------------------------------------------|-------|
| Maximum number of iterations allowed during any time step in solving the Richard's equation                                                                | 30    |
| Maximum tolerated absolute change in the value of the water content between two successive iterations during a particular time step for unsaturated region | 0.001 |
| Maximum tolerated absolute change in the value of the water content between two successive iterations during a particular time step for saturated region   | 0.01  |

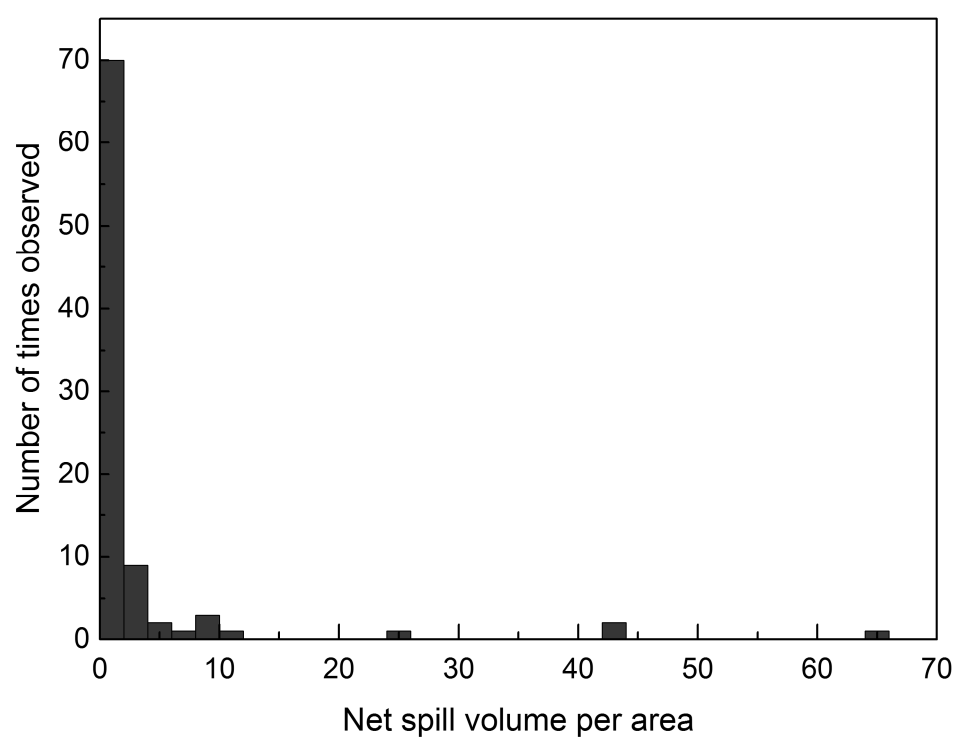

**Figure S1.** Histogram of spill volume per area or spill depth for produced water spills occurring in counties overlying the South Platte Alluvial Aquifer. These data were used for calculating the produced water spill percentiles.

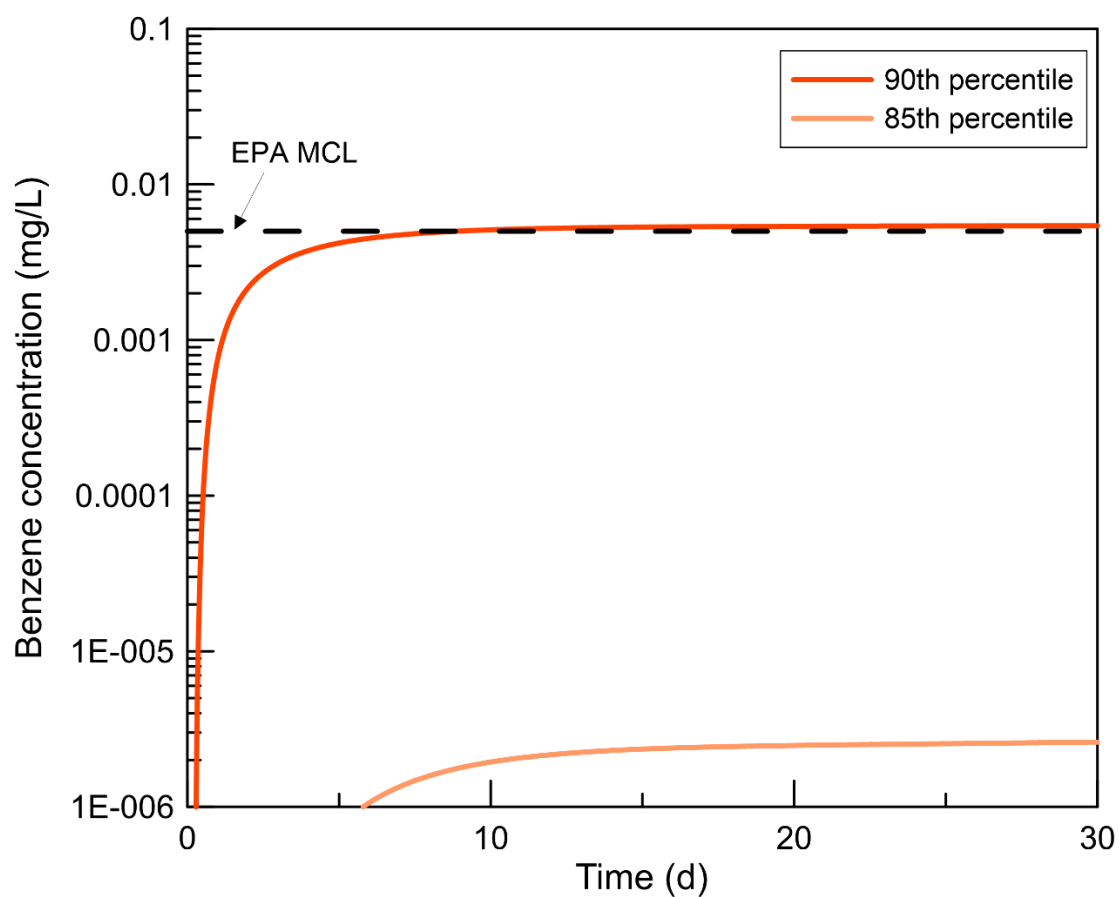

**Figure S2.** Benzene concentration breakthrough curves for the 90<sup>th</sup> and 85<sup>th</sup> percentile spills considering a 2 ft groundwater table and assuming no degradation and no sorption.

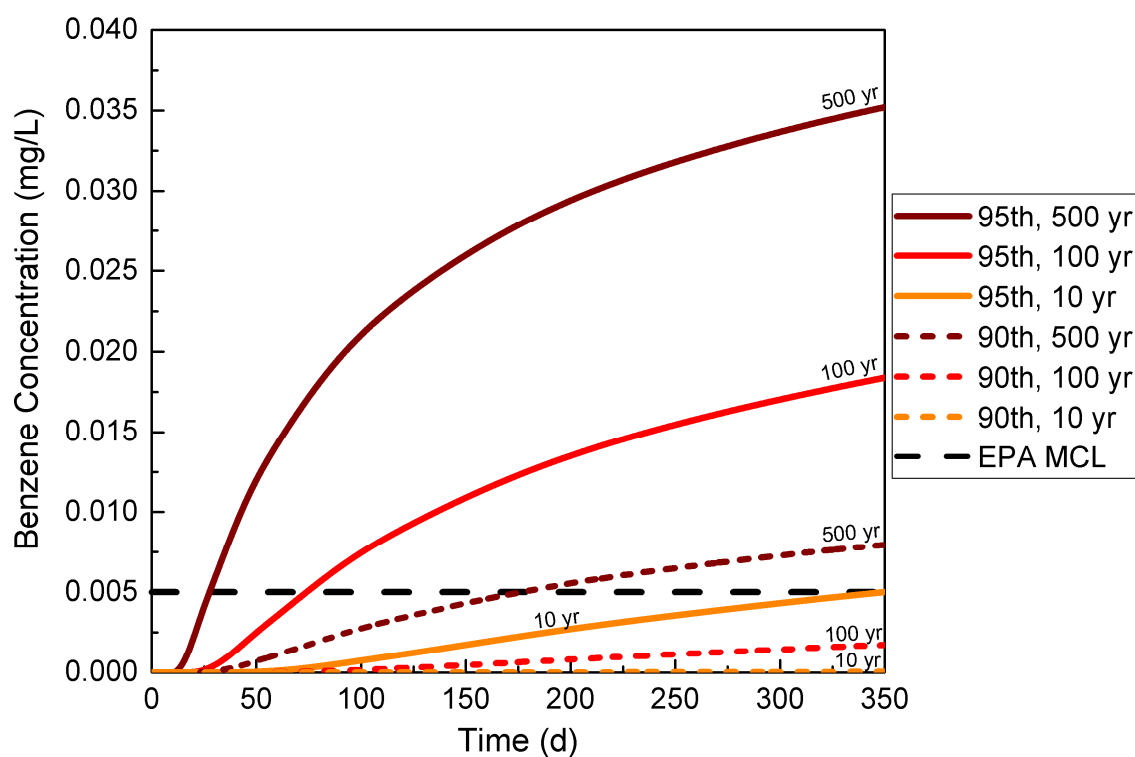

**Figure S3.** Benzene concentration breakthrough curves predicted at a 10-ft groundwater table assuming no degradation and no sorption with storm events occurring immediately following a spill. Solid lines indicate the 95th percentile spill and dashed lines indicate the 90th spill. Darker reds indicate a larger storm size and more yellow colors indicate a smaller storm size. The black dashed line shows the EPA limit at 5  $\mu\text{g/L}$ .

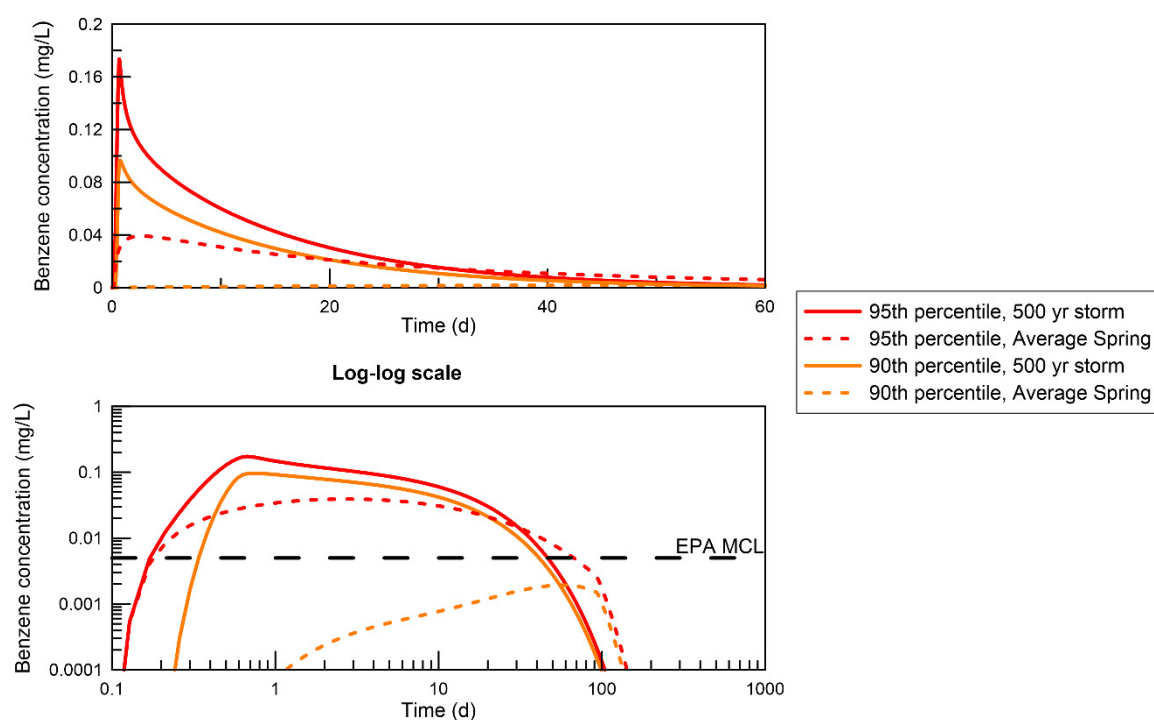

**Figure S4.** Benzene concentration breakthrough curves for a 2-ft water table considering sorption and degradation with precipitation events occurring immediately following a spill. This plot compares the 500 year storm to an average spring (April-May-June), with the same total precipitation depth but different precipitation rates.

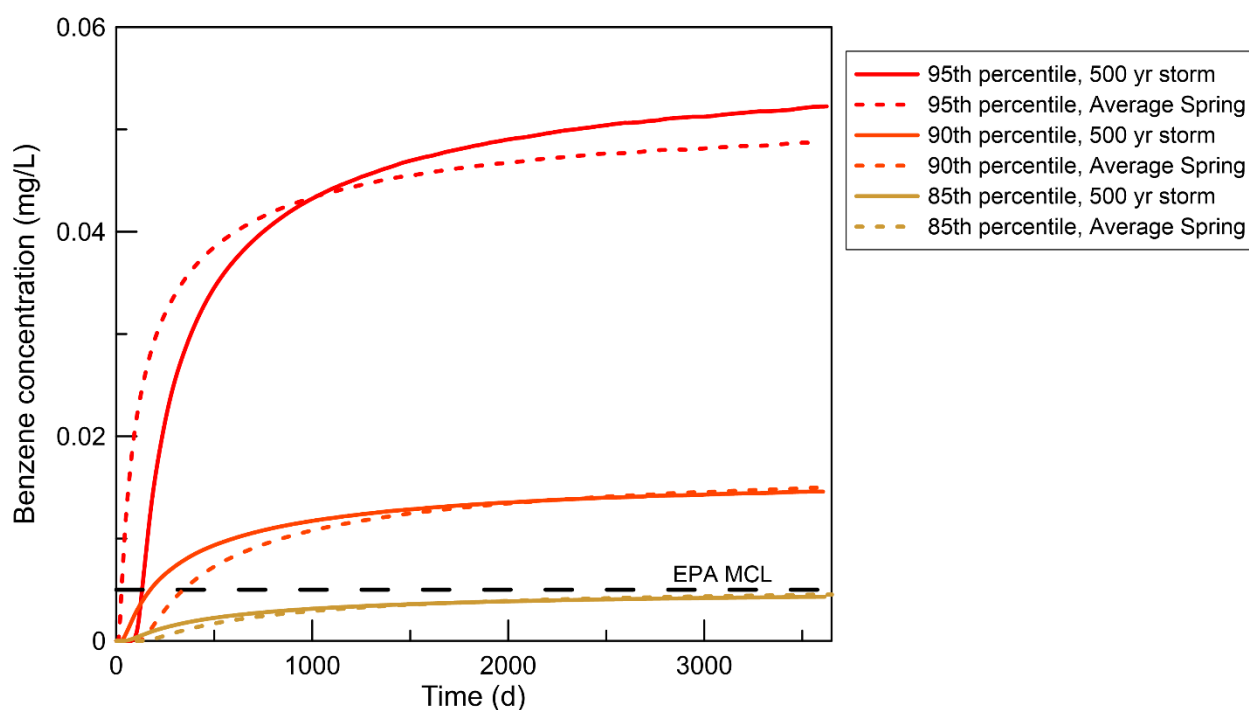

**Figure S5.** Benzene concentration breakthrough curves for a 10-ft water table considering conservative transport with precipitation events occurring immediately following a spill. This plot compares the 500 year storm to an average spring (April-May-June), with the same total precipitation depth but different precipitation rates.
